# Supplementary material
Source: ML conference proceedings conference paper supplement (https://proceedings.neurips.cc/paper_files/paper/2024/hash/6f7ee021d6fafc8ec7d1c97b61a38373-Abstract.html)
Supplement: Supplementary file 1 [file 6f7ee021d6fafc8ec7d1c97b61a38373-Supplemental-Datasets_and_Benchmarks_Track.pdf]

## Checklist

1. For all authors...
  - (a) Do the main claims made in the abstract and introduction accurately reflect the paper's contributions and scope? [Yes]
  - (b) Did you describe the limitations of your work? [Yes] In the implementation and deployment details (Section 3).
  - (c) Did you discuss any potential negative societal impacts of your work? [No] It's hard for us to consider the negative social impacts of AMM, which is not an application but a fundamental data science operator.
  - (d) Have you read the ethics review guidelines and ensured that your paper conforms to them? [Yes]
2. If you are including theoretical results...
  - (a) Did you state the full set of assumptions of all theoretical results? [N/A]
  - (b) Did you include complete proofs of all theoretical results? [N/A]
3. If you ran experiments (e.g. for benchmarks)...
  - (a) Did you include the code, data, and instructions needed to reproduce the main experimental results (either in the supplemental material or as a URL)? [Yes] At <https://anonymous.4open.science/r/LibAMM-5006/>.
  - (b) Did you specify all the training details (e.g., data splits, hyperparameters, how they were chosen)? [N/A] Model training is not involved.
  - (c) Did you report error bars (e.g., with respect to the random seed after running experiments multiple times)? [No] The result in our running is stable multiple times.
  - (d) Did you include the total amount of compute and the type of resources used (e.g., type of GPUs, internal cluster, or cloud provider)? [Yes] Single-thread, CPU-only for most comparison, and we additionally consider utilizing one GPU (Section 3).
4. If you are using existing assets (e.g., code, data, models) or curating/releasing new assets...
  - (a) If your work uses existing assets, did you cite the creators? [Yes]
  - (b) Did you mention the license of the assets? [No] They are open and license-free.
  - (c) Did you include any new assets either in the supplemental material or as a URL? [N/A] We use all asset from existing works.
  - (d) Did you discuss whether and how consent was obtained from people whose data you're using/curating? [N/A] The data is a public resource.
  - (e) Did you discuss whether the data you are using/curating contains personally identifiable information or offensive content? [N/A] They are just open-source numeric values without any personally identifiable information or offensive content.
5. If you used crowdsourcing or conducted research with human subjects...
  - (a) Did you include the full text of instructions given to participants and screenshots, if applicable? [N/A]
  - (b) Did you describe any potential participant risks, with links to Institutional Review Board (IRB) approvals, if applicable? [N/A]
  - (c) Did you include the estimated hourly wage paid to participants and the total amount spent on participant compensation? [N/A]
